# Supplementary material for: Magnetic Targeting of Growth Factors Using Iron Oxide Nanoparticles
Source: MDPI journal article supplement (doi:10.3390/nano8090707), 2018-09-10
Supplement: s1 [file s1]

## Supplementary

**Supplementary 1:** Bare MNPs, before the conjugation to NGF, present a hydrodynamic diameter of  $45 \pm 17$ , as determined by dynamic light scattering.

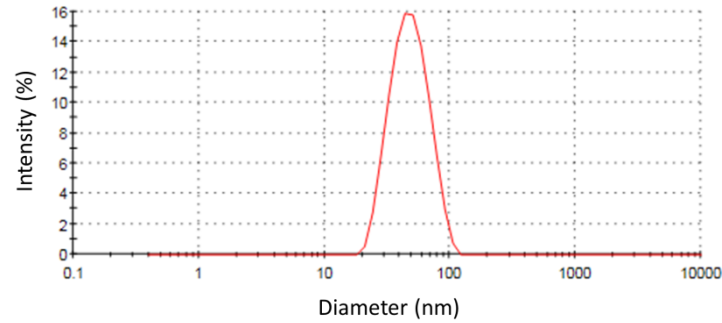

**Figure S1.** Dynamic light scattering measurement of bare MNPs hydrodynamic diameter.

**Supplementary 2:** Using COMSOL software, we simulated the magnet field gradient above the device with 6 magnet rods in a form of a circle with a single rod in the center in the opposite direction.

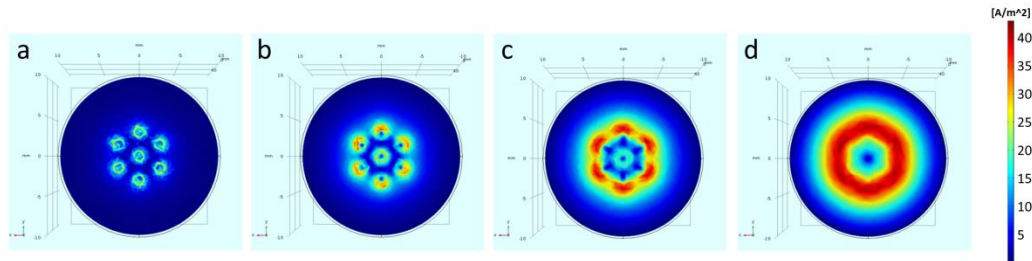

**Figure S2.** Simulation of magnetic field gradient (a) 0.1mm from top (b) 0.5mm from top (c) 1mm from top (d) 2mm from top.

**Supplementary 3:** In order to manipulate MNPs, a magnetic field gradient is required to exert a force at a distance. The force on a magnetic nanoparticle with magnetic moment  $\vec{m}$  is governed by the equation:<sup>27</sup>

$$(1) \quad F_m = (\vec{m}_p \cdot \nabla) B$$

where  $\vec{m}_p$  is the magnetic moment of the particle and B is the magnetic field flux density.

Due to the superparamagnetic properties of the particles, the magnetic moment is proportional to the external field

$$(2)$$

$$m_p = \frac{V_m \Delta \chi B}{\mu_0}$$

where  $V_m$  is the volume of the particle and  $\chi$  is the magnetic susceptibility of the particle.

Hence, equation (1) becomes

$$(3) \quad F_m = \frac{V_m \Delta \chi}{\mu_0} (B \cdot \nabla) B$$

To maximize the force, the magnet system should, on the one hand, generate field  $B \rightarrow$  that is sufficiently strong at the location of the magnetic nanoparticle to maximize the induced magnetization  $m_p$ . On the other hand, the magnet system should generate strong field gradients at the nanoparticle's location.
